# Supplementary material for: Tumor edge-to-core transition promotes malignancy in primary-to-recurrent glioblastoma progression in a PLAGL1/CD109-mediated mechanism
Source: PubMed Central journal article supplement (PMC7764499; doi:10.1093/noajnl/vdaa163), 2020-11-27

# Supplementary Figure.1

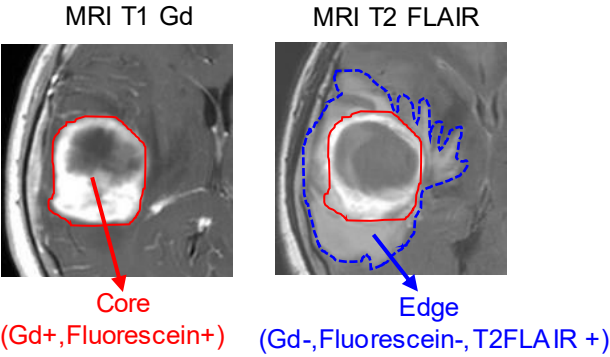

# Supplementary Figure.2

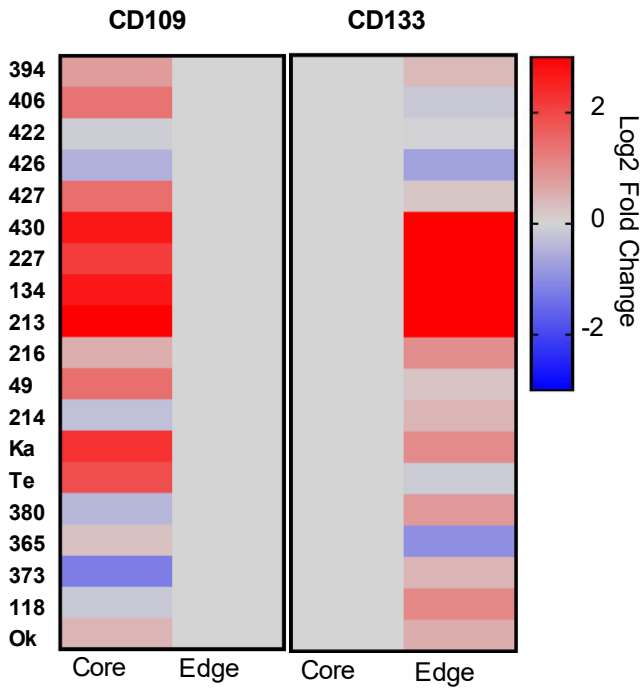

# Supplementary Figure.3

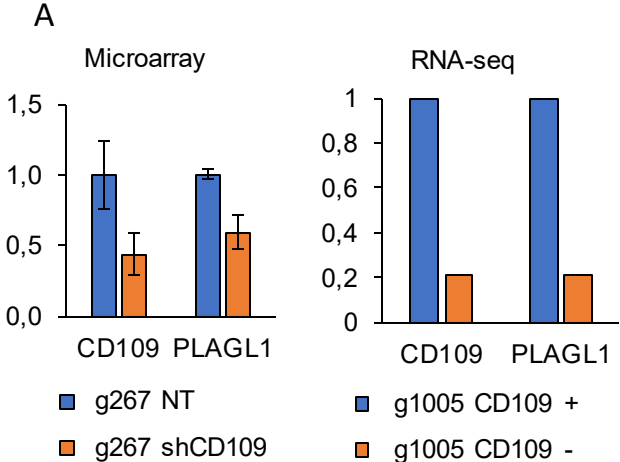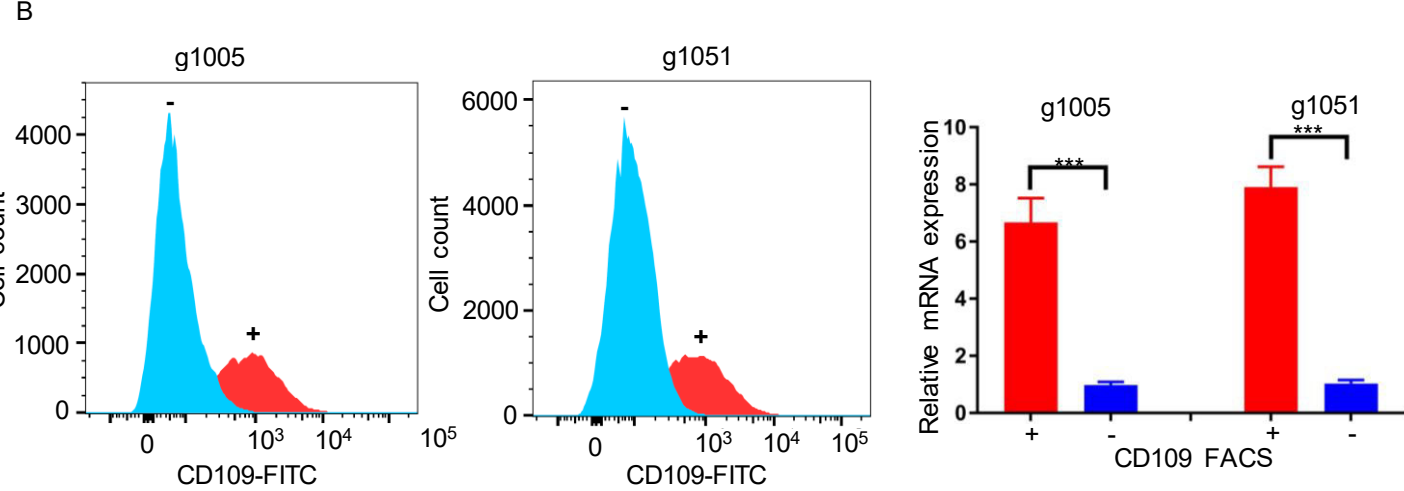

# Supplementary Figure.4

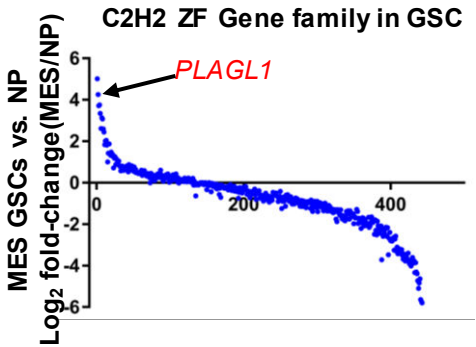

# Supplementary Figure.5

A

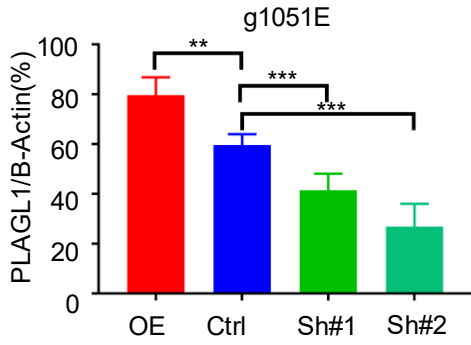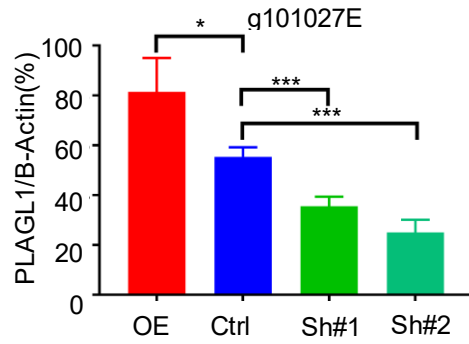

B

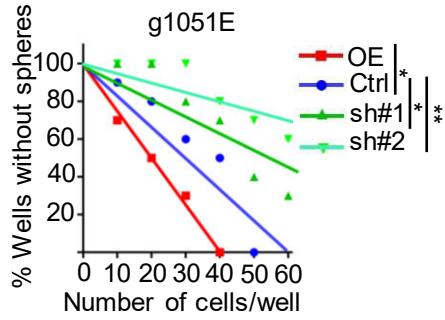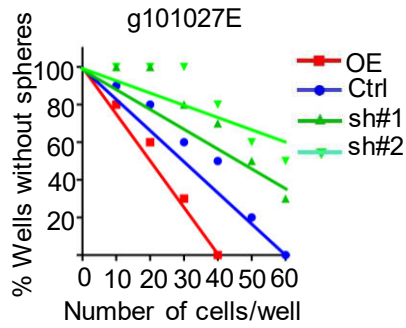

# Supplementary Figure.6

g1051E human mitochondria staining

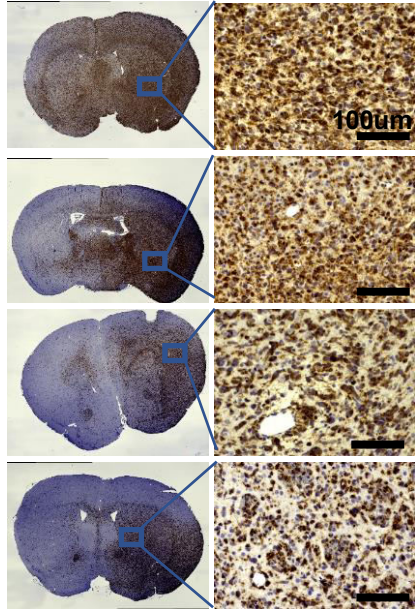

g101027E human mitochondria staining

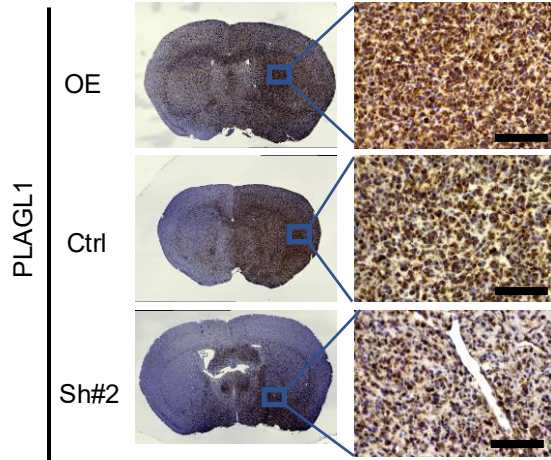

PLAGL1

PLAGL1

# Supplementary Figure.7

A

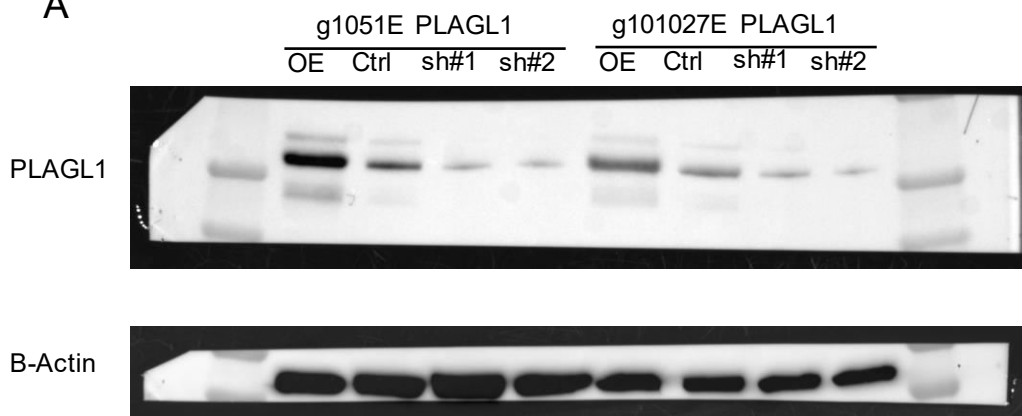

B

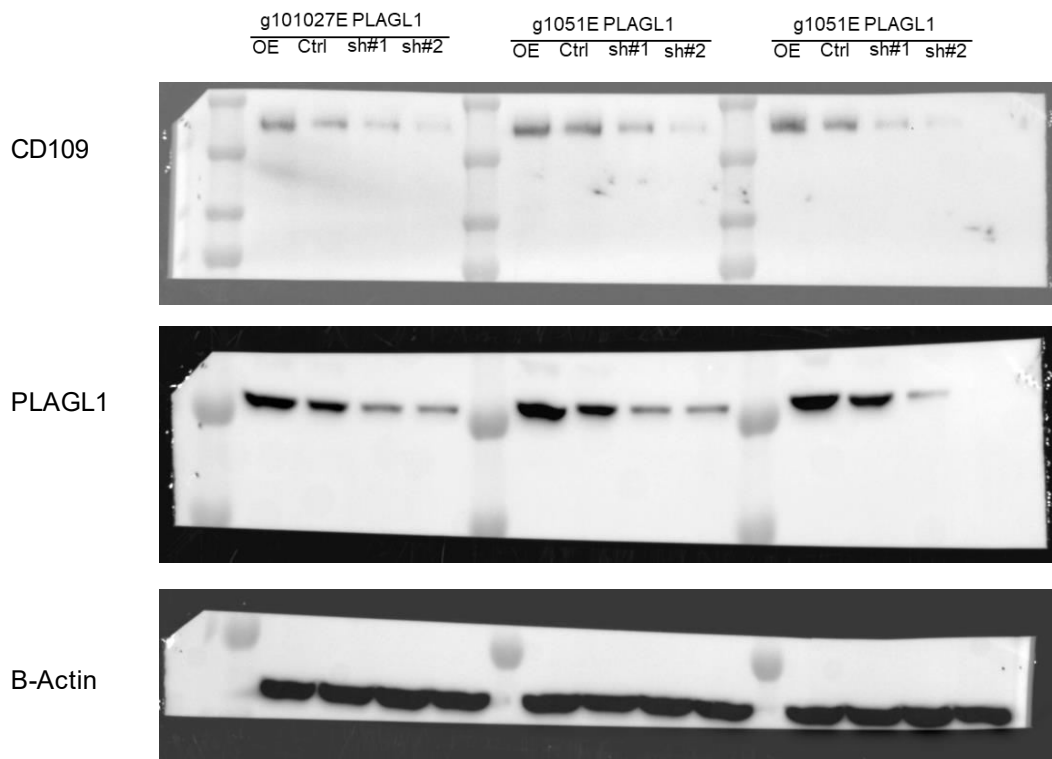

Supplement: vdaa163_suppl_supplementary_figures.pdf [file vdaa163_suppl_supplementary_figures.pdf]
